# Supplementary material for: Lateral hypothalamic kindling induces manic-like behavior in rats: a novel animal model
Source: Springer Nature journal article supplement (doi:10.1186/s40345-014-0007-8), 2014-06-13
Supplement: MOESM6 [file 25664910]

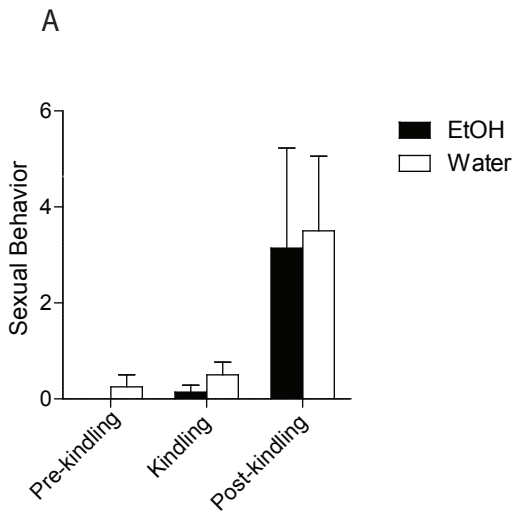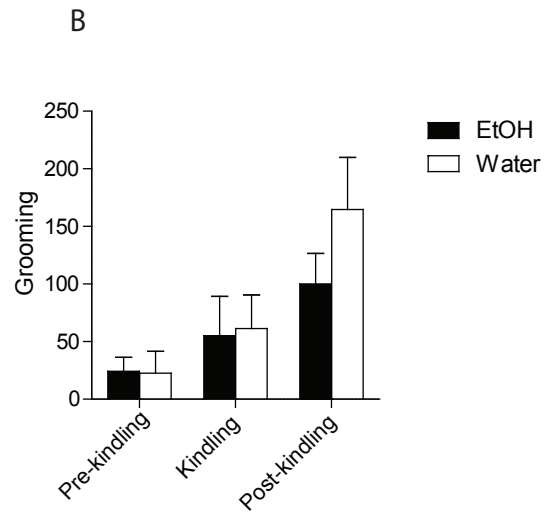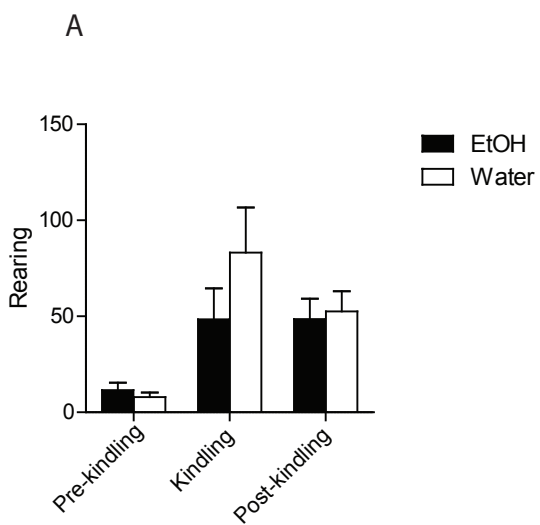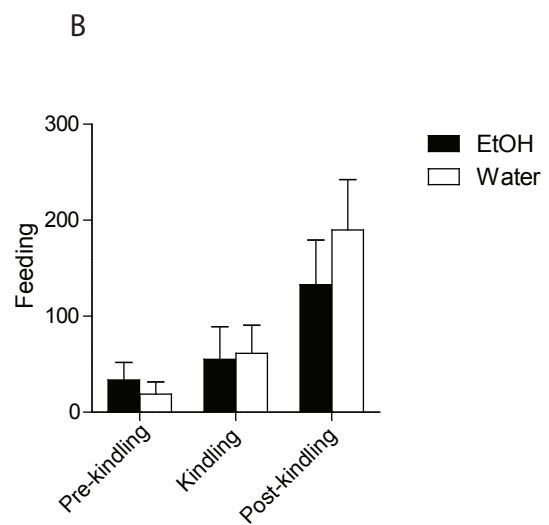

Abulseoud et al ., Supplementary Fig. 2
